# Supplementary material for: Quasi-solid-state dye-sensitized indoor photovoltaics with efficiencies exceeding 25%
Source: Royal Society of Chemistry journal article supplement (doi:10.1039/d0ta07603a), 2020-01-01
Supplement: d0ta07603a1.pdf [file d0ta07603a1.pdf]

## *Supplementary Information*

### Quasi-solid-state dye-sensitized indoor photovoltaics with efficiencies exceeding 25%

I-Ping Liu,<sup>ab</sup> Yu-Syuan Cho,<sup>a</sup> Hsisheng Teng<sup>abc</sup> and Yuh-Lang Lee<sup>\*ab</sup>

<sup>a</sup> Department of Chemical Engineering, National Cheng Kung University, No. 1, University Road, Tainan City 70101, Taiwan (Republic of China)

<sup>b</sup> Hierarchical Green-Energy Materials Research Center, National Cheng Kung University, No. 1, University Road, Tainan City 70101, Taiwan (Republic of China)

<sup>c</sup> Center of Applied Nanomedicine, National Cheng Kung University, No. 1, University Road, Tainan City 70101, Taiwan (Republic of China)

\* Corresponding author. *E-mail address:* ylllee@mail.ncku.edu.tw (Y.-L. Lee)

The supplementary information file includes 20 pages, experimental sections, 7 figures, 6 tables and 12 references.

## Table of contents

|                                                                                                                                                                                                                                       | Page |
|---------------------------------------------------------------------------------------------------------------------------------------------------------------------------------------------------------------------------------------|------|
| <b>Experimental section – Materials</b> .....                                                                                                                                                                                         | S2   |
| <b>Experimental section – Fabrication of counter electrodes</b> .....                                                                                                                                                                 | S3   |
| <b>Experimental section – Characterization</b> .....                                                                                                                                                                                  | S4   |
| <b>Table S1</b> Electrochemical characteristics of the electrolytes prepared using the starting composition [0.22 M Co(II), 0.05 M Co(III), 0.1 M LiClO <sub>4</sub> , 0.2 M <i>t</i> BP].....                                        | S6   |
| <b>Table S2</b> Photovoltaic parameters of the Y123 DS <i>i</i> PV cells using the starting electrolyte composition under 1-sun irradiation.....                                                                                      | S7   |
| <b>Table S3</b> Photovoltaic parameters of the Y123 DS <i>i</i> PV cells using half numbers of redox couples [0.11 M Co(II) and 0.025 M Co(III)] under 200-lux fluorescent lighting (incident power: 68.2 μW cm <sup>-2</sup> ).....  | S8   |
| <b>Table S4</b> Photovoltaic parameters of the DS <i>i</i> PV cells (gel <b>electrolyte C</b> ) with different cosensitization conditions under 200-lux fluorescent lighting (incident power: 68.2 μW cm <sup>-2</sup> ).....         | S9   |
| <b>Table S5</b> Photovoltaic parameters of the conventional DS <i>i</i> PV cells (gel <b>electrolyte C</b> , D35/XY1b = 7/3) using PEDOT catalysts under various LED lighting.....                                                    | S10  |
| <b>Table S6</b> Comparison of various organic indoor photovoltaics at illuminance of around 1000 lux.....                                                                                                                             | S11  |
| <b>Reference</b> Reference S1~S12.....                                                                                                                                                                                                | S12  |
| <b>Fig. S1</b> Equivalent circuits adopted to fit the Nyquist spectra of (a) dummy and (b) DS <i>i</i> PV cells.....                                                                                                                  | S13  |
| <b>Fig. S2</b> Impedance characteristics of the Y123 DS <i>i</i> PV cells based on <b>electrolyte A</b> : (a) Nyquist spectra obtained at an applied voltage of 0.85 V; (b) electron lifetime as a function of corrected voltage..... | S14  |
| <b>Fig. S3</b> EQE spectra of the DS <i>i</i> PV cells (gel <b>electrolyte C</b> ) with different sensitization conditions.....                                                                                                       | S15  |
| <b>Fig. S4</b> Nyquist spectra related to the dummy cells (gel <b>electrolyte C</b> ) assembled using Pt- and PEDOT-loaded electrodes (at 0 V).....                                                                                   | S16  |
| <b>Fig. S5</b> <i>J-V</i> curves of the conventional DS <i>i</i> PV cells (gel <b>electrolyte C</b> , D35/XY1b = 7/3) using PEDOT catalysts under different LED lighting (6500 K).....                                                | S17  |
| <b>Fig. S6</b> Cross-sectional SEM images of the (a) double- and (b) single-layered TiO <sub>2</sub> thin films for assembling conventional and bifacial cells respectively.....                                                      | S18  |
| <b>Fig. S7</b> Performance of an 11.2 cm <sup>2</sup> DS <i>i</i> PV module device measured under 600-lux fluorescent lighting.....                                                                                                   | S19  |

## Experimental section

### Materials

Poly(vinylidene fluoride-*co*-hexafluoropropylene) (PVDF-HFP, average  $M_w$  ~400,000), poly(methylmethacrylate) (PMMA,  $M_w$  ~120,000), ammonium hexafluorophosphate ( $\text{NH}_4\text{PF}_6$ , 99.99%), 3,4-ethylenedioxythiophene (EDOT, 97%) and titanium diisopropoxide bis(acetylacetonate) (75 wt.% in isopropanol) were purchased from Aldrich Chemistry. 2,2'-Bipyridyl (99+%), cobalt(II) chloride hexahydrate ( $\text{CoCl}_2 \cdot 6\text{H}_2\text{O}$ , 98%) and nitrosyl tetrafluoroborate ( $\text{NOBF}_4$ , 98%) were procured from Alfa Aesar. Lithium perchlorate ( $\text{LiClO}_4$ , 98%) and titanium(IV) chloride ( $\text{TiCl}_4$ , 98%) were obtained from Fluka. Ethanol (99.9%), methanol (99.8%) and sodium dodecyl sulfate (SDS, ultrapure bioreagent) were acquired from J. T. Baker. 4-*tert*-butylpyridine (*t*BP,  $\text{C}_9\text{H}_{13}\text{N}$ , 96%) and *tert*-butanol [ $(\text{CH}_3)_3\text{COH}$ , 99%] were received from Sigma-Aldrich. Acetonitrile ( $\text{CH}_3\text{CN}$ , 99.5%) were procured from Riedel-de Haën. Titanium dioxide pastes of 30 NR-D (for transparent layer) and PST-400C (for light-scattering layer) were purchased from Greatcell Solar and JGC C&C (JGC Catalysts and Chemicals Ltd.), respectively. Three dye sensitizers: 3-{6-[4-[*bis*(2',4'-dihexyloxybiphenyl-4-yl)amino-]phenyl]-4,4-dihexyl-cyclopenta-[2,1-*b*:3,4-*b'*]dithiophene-2-yl]-2-cyanoacrylic acid (called Y123), (E)-3-(5-(4-(*bis*(2',4'-dibutoxy-[1,1'-biphenyl]-4-yl)amino)phenyl)thiophen-2-yl)-2-cyanoacrylic acid (known as D35 or Dyenamo Orange), (E)-3-(4-(6-(7-(4-(*bis*(2',4'-dibutoxy-[1,1'-biphenyl]-4-yl)amino)phenyl)benzo[*c*][1,2,5]thiadiazol-4-yl)-4,4-*bis*(2-ethylhexyl)-4H-cyclopenta[2,1-*b*:3,4-*b'*]dithiophen-2-yl)phenyl)-2-cyanoacrylic acid (called XY1b) were obtained from Dyenamo AB. All chemicals were used as received without further purification.

## **Experimental section**

### **Fabrication of counter electrodes**

Two kinds of counter electrodes were employed in this work. The platinum (Pt) electrode was prepared by sputtering. The Pt catalysts were deposited onto fluorine-doped tin oxide-coated glass substrates (FTO, TEC 7, 2.2 mm thick) using a sputter coater (108auto, Cressington Scientific Instruments). The sputtering parameters, including controlled current of 40 mA, argon pressure of 0.06 mbar and coating time of 140 sec, were adopted for fabrication of each Pt electrodes. The other counter electrode was prepared by electrodeposition of polymer materials. A two-electrode electrochemical system and a potentiostat (CHI627D, CH Instruments) were used; both of electrodes were cleaned FTO substrates, and the electrolyte consists of 0.1 M SDS and 0.01 M EDOT in deionized water. The electrodeposition was performed by scanning the potential between  $-1$  and  $1.4$  V for 5 cycles at a scan rate of  $50$  mV  $\text{sec}^{-1}$ . After the deposition, substrates were rinsed by deionized water and dried by air, and the PEDOT electrodes were obtained.

## Experimental section

### Characterization

Absorption and transmittance spectra were measured using a UV-vis spectrometer (Cintra 10e, GBC Scientific Equipment). The cross-sectional morphology of TiO<sub>2</sub> thin films was examined using a scanning electron microscope (SEM, SU8010, Hitachi). Electrochemical impedance spectroscopy (EIS), Tafel polarization and photocurrent transient analyses were performed on a potentiostat equipped with an FRA module (PGSTAT30, Metrohm Autolab). The EIS measurements were conducted in the dark at a controlled potential, and 10 mV AC sinusoidal signals were applied over a frequency range of 100 mHz to 100 kHz. The scan rate adopted in the Tafel polarization analysis is 10 mV sec<sup>-1</sup>. Photocurrent transients were traced under different lighting conditions.

Photovoltaic characteristics (*J-V* curves) of the studied DSiPV devices were recorded with a digital source meter, scanning from 0 V to the relevant open-circuit voltages, under sunlight or fluorescent-light conditions. A solar simulator (XES-301S, AM 1.5G, AAA class, San-Ei Electric) calibrated by a certified reference silicon cell was employed to generate sunlight. A homemade system was built for measuring indoor photovoltaic performance; this system was wrapped by black curtains and consisted of an upper board, a bottom platform and a motor-controlled lifter. Fluorescent tubes (TL5 Essential 14W/865, Philips) covered by woven wire meshes (20 mesh, Stainless Steel 304L) were fixed to the upper board. The lifter could adjust the distance between the board and platform. To achieve illuminances of 200, 600 and 1000 lux, three layers of wire meshes were used, and the distances were controlled as ~91, ~46 and ~33 cm, respectively; for the illuminances of 1500 and 2000 lux, the distances were ~49 and ~39 cm, and no mesh was employed. A digital light meter (YF-170, TENMARS ELECTRONICS) was used to examine the illuminance, and the spectral irradiance (incident power) was determined by a spectroradiometer (S-2440 model II, SOMA OPTICS). External

quantum efficiency spectra were measured using an Enlitech system (QE-R3011, xenon light source, DC mode).

**Table S1** Electrochemical characteristics of the electrolytes prepared using the starting composition [0.22 M Co(II), 0.05 M Co(III), 0.1 M LiClO<sub>4</sub>, 0.2 M *t*BP]

| <b>Electrolyte A</b>  | $R_s^a$<br>( $\Omega$ cm <sup>2</sup> ) | $R_{ct}^a$<br>( $\Omega$ cm <sup>2</sup> ) | $R_d^a$<br>( $\Omega$ cm <sup>2</sup> ) | $J_{lim}^b$<br>(mA cm <sup>-2</sup> ) | $D^b$<br>(cm <sup>2</sup> s <sup>-1</sup> ) |
|-----------------------|-----------------------------------------|--------------------------------------------|-----------------------------------------|---------------------------------------|---------------------------------------------|
| Liquid                | 1.39                                    | 8.32                                       | 8.33                                    | 6.38                                  | $3.97 \times 10^{-6}$                       |
| PVDF-HFP/PMMA<br>10/0 | 1.34                                    | 5.58                                       | 10.5                                    | 6.24                                  | $3.88 \times 10^{-6}$                       |
| PVDF-HFP/PMMA<br>9/1  | 1.37                                    | 8.78                                       | 10.3                                    | 5.68                                  | $3.52 \times 10^{-6}$                       |
| PVDF-HFP/PMMA<br>8/2  | 1.37                                    | 9.72                                       | 10.3                                    | 5.67                                  | $3.54 \times 10^{-6}$                       |

Parameters acquired by the <sup>a</sup> EIS analysis and <sup>b</sup> Tafel polarization.

$R_s$ : Series resistance.

$R_{ct}$ : Charge transfer resistance at the Pt-electrode/electrolyte interface.

$R_d$ : Diffusion resistance.

$J_{lim}$ : Limiting current density.

$D$ : Apparent diffusion coefficients related to the Co(bpy)<sub>3</sub><sup>3+</sup> species.

**Table S2** Photovoltaic parameters of the Y123 DSiPV cells using the starting electrolyte composition under 1-sun irradiation

| <b>Electrolyte A</b>  | $J_{sc}$<br>(mA cm <sup>-2</sup> ) | $V_{oc}^a$<br>(V) | FF    | PCE <sup>b</sup><br>(%) |
|-----------------------|------------------------------------|-------------------|-------|-------------------------|
| Liquid                | 13.03                              | 0.835<br>(0.621)  | 0.682 | 7.42 ± 0.10<br>(0.11)   |
| PVDF-HFP/PMMA<br>10/0 | 12.96                              | 0.846<br>(0.635)  | 0.676 | 7.41 ± 0.09<br>(0.10)   |
| PVDF-HFP/PMMA<br>9/1  | 10.61                              | 0.848<br>(0.652)  | 0.697 | 6.27 ± 0.11<br>(0.12)   |
| PVDF-HFP/PMMA<br>8/2  | 8.26                               | 0.826<br>(0.644)  | 0.715 | 4.88 ± 0.10<br>(0.11)   |

<sup>a</sup> The voltages at the maximum power point are shown in parentheses. <sup>b</sup> The PCE values are expressed as mean value ± margin of error (95% confidence interval), and the numbers shown in parentheses are standard deviations based on five cells.



**Table S3** Photovoltaic parameters of the Y123 DSiPV cells using half numbers of redox couples [0.11 M Co(II) and 0.025 M Co(III)] under 200-lux fluorescent lighting (incident power: 68.2  $\mu\text{W cm}^{-2}$ )

| Gel Electrolyte                           | $J_{sc}$<br>( $\mu\text{A cm}^{-2}$ ) | $V_{oc}^a$<br>(V) | FF    | PCE <sup>b</sup><br>(%)   |
|-------------------------------------------|---------------------------------------|-------------------|-------|---------------------------|
| <b>Electrolyte B</b><br>0.2 M <i>t</i> BP | 25.87                                 | 0.625<br>(0.514)  | 0.745 | 17.7 $\pm$ 0.15<br>(0.17) |
| <b>Electrolyte C</b><br>1.2 M <i>t</i> BP | 23.92                                 | 0.692<br>(0.576)  | 0.780 | 18.9 $\pm$ 0.21<br>(0.23) |

<sup>a</sup> The voltages at the maximum power point are shown in parentheses. <sup>b</sup> The PCE values are expressed as mean value  $\pm$  margin of error (95% confidence interval), and the numbers shown in parentheses are standard deviations based on five cells.

**Table S4** Photovoltaic parameters of the DSiPV cells (gel electrolyte C) with different cosensitization conditions under 200-lux fluorescent lighting (incident power:  $68.2 \mu\text{W cm}^{-2}$ )

| Cosensitization | $J_{\text{sc}}$<br>( $\mu\text{A cm}^{-2}$ ) | $V_{\text{oc}}^a$<br>(V) | FF    | PCE <sup>b</sup><br>(%)   |
|-----------------|----------------------------------------------|--------------------------|-------|---------------------------|
| D35/XY1b (9/1)  | 23.70                                        | 0.709<br>(0.598)         | 0.783 | $19.3 \pm 0.13$<br>(0.15) |
| D35/XY1b (7/3)  | 25.71                                        | 0.707<br>(0.592)         | 0.770 | $20.5 \pm 0.16$<br>(0.19) |
| D35/XY1b (1/1)  | 24.44                                        | 0.711<br>(0.574)         | 0.761 | $19.4 \pm 0.18$<br>(0.20) |

<sup>a</sup> The voltages at the maximum power point are shown in parentheses. <sup>b</sup> The PCE values are expressed as mean value  $\pm$  margin of error (95% confidence interval), and the numbers shown in parentheses are standard deviations based on five cells.

**Table S5** Photovoltaic parameters of the conventional DSiPV cells (gel electrolyte C, D35/XY1b = 7/3) using PEDOT catalysts under various LED lighting

| LED Lighting                                          | $J_{sc}$<br>( $\mu\text{A cm}^{-2}$ ) | $V_{oc}^a$<br>(V) | FF    | PCE <sup>b</sup><br>(%)   |
|-------------------------------------------------------|---------------------------------------|-------------------|-------|---------------------------|
| 200 lux<br>(70.0 $\mu\text{W cm}^{-2}$ ) <sup>c</sup> | 28.20                                 | 0.718<br>(0.599)  | 0.780 | 22.6 $\pm$ 0.21<br>(0.25) |
| 600 lux<br>(203 $\mu\text{W cm}^{-2}$ ) <sup>c</sup>  | 84.08                                 | 0.757<br>(0.647)  | 0.790 | 24.8 $\pm$ 0.06<br>(0.07) |
| 1000 lux<br>(333 $\mu\text{W cm}^{-2}$ ) <sup>c</sup> | 141.1                                 | 0.775<br>(0.655)  | 0.792 | 26.0 $\pm$ 0.09<br>(0.10) |

<sup>a</sup> The voltages at the maximum power point are shown in parentheses. <sup>b</sup> The PCE values are expressed as mean value  $\pm$  margin of error (95% confidence interval), and the numbers shown in parentheses are standard deviations based on five cells. <sup>c</sup> Incident power.

**Table S6** Comparison of various organic indoor photovoltaics at illuminance of around 1000 lux

| Device           | Features                                                                                          | Lighting and Illuminance         | $J_{sc}$ ( $\mu\text{A cm}^{-2}$ ) | $V_{oc}$ (V) | FF    | PCE (%)           | Ref.      |
|------------------|---------------------------------------------------------------------------------------------------|----------------------------------|------------------------------------|--------------|-------|-------------------|-----------|
| DSC              | Quasi-Solid-State Gel EL <sup>a</sup><br>Cobalt Redox Couple<br>D35 & XY1b Dyes<br>PEDOT Catalyst | FL <sup>b</sup> Tube<br>1000 lux | 137.6                              | 0.770        | 0.786 | 25.3              | This work |
| DSC              | Copper Redox Couple<br>D35 & XY1 Dyes<br>PEDOT Catalyst                                           | FL <sup>b</sup> Tube<br>1000 lux | 138.0                              | 0.797        | 0.80  | 28.9              | [S1]      |
| DSC              | TY6 Dye with Coabsorbent                                                                          | FL <sup>b</sup> Lamp<br>1200 lux | 164                                | 0.671        | 0.778 | 24.4              | [S2]      |
| DSC              | YL4 Dye with Coabsorbent                                                                          | FL <sup>b</sup> Lamp<br>1025 lux | 224                                | 0.576        | 0.63  | 25.0              | [S3]      |
| DSC              | New DSC Architecture<br>Copper Redox Couple<br>XY1b & Y123 Dyes<br>PEDOT Catalyst                 | FL <sup>b</sup> Tube<br>1000 lux | 149.3                              | 0.878        | 0.773 | 31.8              | [S4]      |
| DSC              | Copper Redox Couple<br>XY1 & 5T Dyes<br>PEDOT Catalyst                                            | FL <sup>b</sup> Lamp<br>1000 lux | 131.2                              | 0.860        | 0.78  | 29.2              | [S5]      |
| DSC              | Copper Redox Couple<br>XY1 & L1 Dyes<br>PEDOT Catalyst                                            | FL <sup>b</sup> Tube<br>1000 lux | 147                                | 0.910        | 0.77  | 34.0              | [S6]      |
| OPV              | BTR:PC <sub>71</sub> BM <sup>c</sup>                                                              | FL <sup>b</sup> Lamp<br>1000 lux | 133.1                              | 0.791        | 0.752 | 28.1              | [S7]      |
| OPV              | PDTBTBz-2F <sub>anti</sub> :PC <sub>71</sub> BM <sup>c</sup>                                      | LED<br>1000 lux                  | 112.4                              | 0.817        | 0.704 | 23.1              | [S8]      |
| OPV              | PBDB-TF:IO-4Cl <sup>c</sup>                                                                       | LED (2700 K)<br>1000 lux         | 90.6                               | 1.10         | 0.791 | 26.1              | [S9]      |
| PSK <sup>d</sup> | Two-Step PC <sub>61</sub> BM ETL <sup>e</sup>                                                     | FL <sup>b</sup> Lamp<br>1000 lux | 132.26                             | 0.84         | 0.75  | 26.3              | [S10]     |
| PSK <sup>d</sup> | Ambient Process                                                                                   | FL <sup>b</sup> Lamp<br>1000 lux | 129.5                              | 0.858        | 0.753 | 27.0              | [S11]     |
| PSK <sup>d</sup> | Triple-Anion PSK <sup>d</sup> Film                                                                | FL <sup>b</sup> Lamp<br>1000 lux | 126.2                              | 1.028        | 0.768 | 36.3 <sup>f</sup> | [S12]     |

<sup>a</sup> Electrolyte. <sup>b</sup> Fluorescent. <sup>c</sup> Organic donor:acceptor system. <sup>d</sup> Perovskite. <sup>e</sup> Electron-transporting layer. <sup>f</sup> Record efficiency of the indoor photovoltaic.

## References

- [S1] M. Freitag, J. Teuscher, Y. Saygili, X. Zhang, F. Giordano, P. Liska, J. Hua, S. M. Zakeeruddin, J.-E. Moser, M. Grätzel and A. Hagfeldt, *Nat. Photonics*, 2017, **11**, 372–378.
- [S2] Y. S. Tingare, N. S. Vinh, H.-H. Chou, Y.-C. Liu, Y.-S. Long, T.-C. Wu, T.-C. Wei and C.-Y. Yeh, *Adv. Energy Mater.*, 2017, **7**, 1700032.
- [S3] C.-T. Li, Y.-L. Kuo, CH. P. Kumar, P.-T. Huang and J. T. Lin, *J. Mater. Chem. A*, 2019, **7**, 23225–23233.
- [S4] Y. Cao, Y. Liu, S. M. Zakeeruddin, A. Hagfeldt and M. Grätzel, *Joule*, 2018, **2**, 1–10.
- [S5] E. Tanaka, H. Michaels, M. Freitag and N. Robertson, *J. Mater. Chem. A*, 2020, **8**, 1279–1287.
- [S6] H. Michaels, M. Rinderle, R. Freitag, I. Benesperi, T. Edvinsson, R. Socher, A. Gagliardi and M. Freitag, *Chem. Sci.*, 2020, **11**, 2895–2906.
- [S7] H. K. H. Lee, J. Wu, J. Barbé, S. M. Jain, S. Wood, E. M. Speller, Z. Li, F. A. Castro, J. R. Durrant and W. C. Tsoi, *J. Mater. Chem. A*, 2018, **6**, 5618–5626.
- [S8] Y.-J. You, C. E. Song, Q. V. Hoang, Y. Kang, J. S. Goo, D.-H. Ko, J.-J. Lee, W. S. Shin and J. W. Shim, *Adv. Funct. Mater.*, 2019, **29**, 1901171.
- [S9] Y. Cui, Y. Wang, J. Bergqvist, H. Yao, Y. Xu, B. Gao, C. Yang, S. Zhang, O. Inganäs, F. Gao and J. Hou, *Nat. Energy*, 2019, **4**, 768–775.
- [S10] C.-Y. Chen, J.-H. Chang, K.-M. Chiang, H.-L. Lin, S.-Y. Hsiao and H.-W. Lin, *Adv. Funct. Mater.*, 2015, **25**, 7064–7070.
- [S11] R. Cheng, C.-C. Chung, H. Zhang, Z. Zhou, P. Zhai, Y.-T. Huang, H. Lee and S.-P. Feng, *Small*, 2019, **15**, 1804465.
- [S12] R. Cheng, C.-C. Chung, H. Zhang, F. Liu, W.-T. Wang, Z. Zhou, S. Wang, A. B. Djurišić and S.-P. Feng, *Adv. Energy Mater.*, 2019, **9**, 1901980.

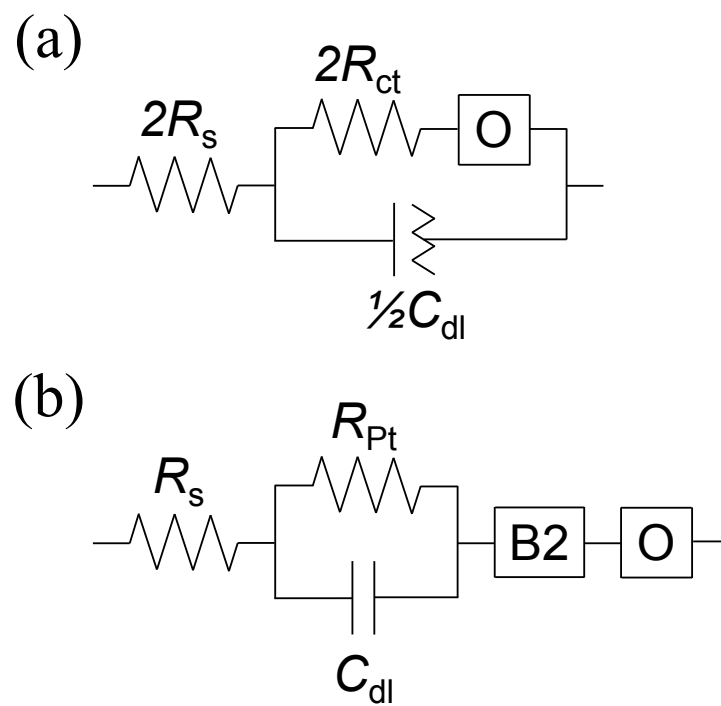

**Fig. S1** Equivalent circuits adopted to fit the Nyquist spectra of (a) dummy and (b) DSiPV cells.

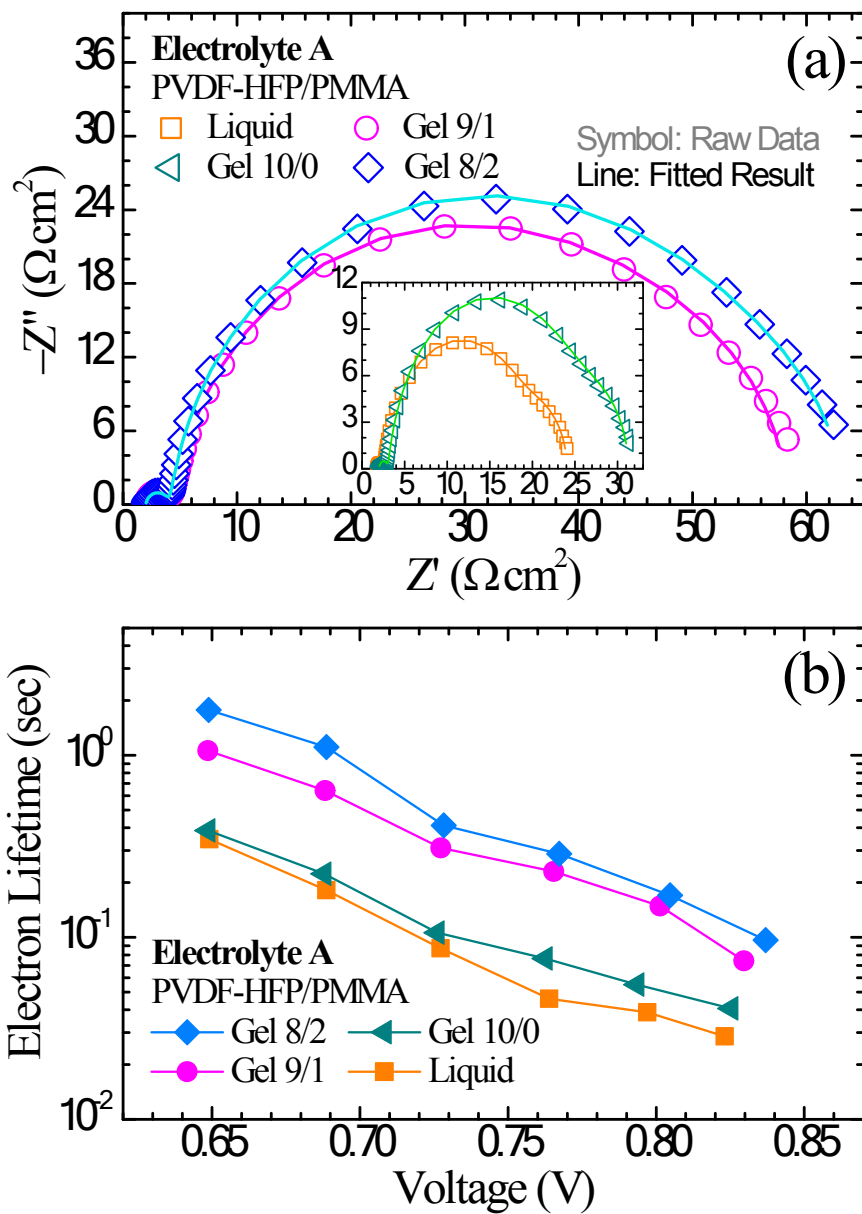

**Fig. S2** Impedance characteristics of the Y123 DSiPV cells based on **electrolyte A**: (a) Nyquist spectra obtained at an applied voltage of 0.85 V; (b) electron lifetime as a function of corrected voltage.

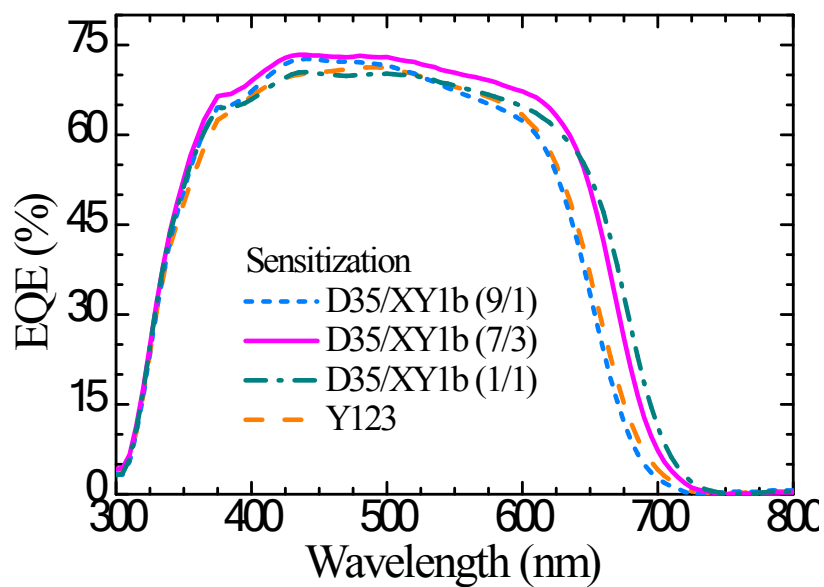

**Fig. S3** EQE spectra of the DSiPV cells (gel electrolyte C) with different sensitization conditions.



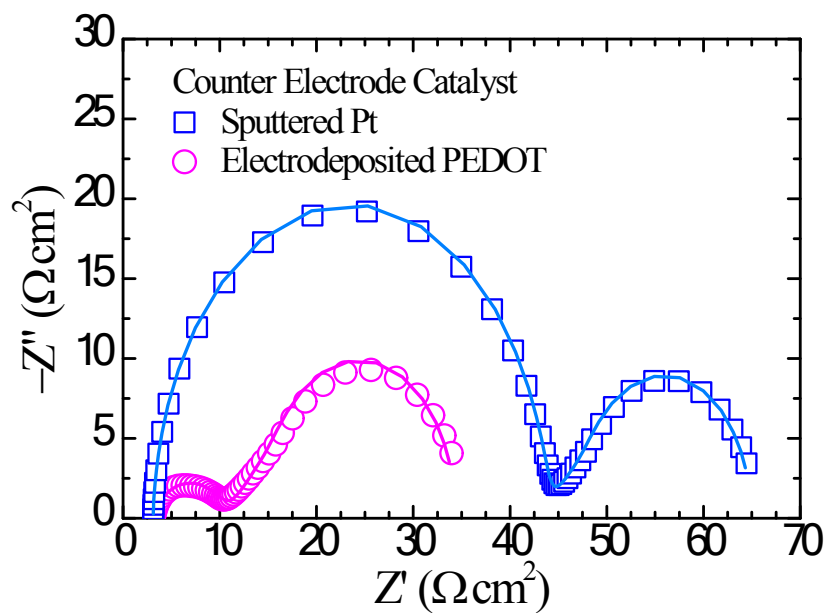

**Fig. S4** Nyquist spectra related to the dummy cells (gel electrolyte C) assembled using Pt- and PEDOT-loaded electrodes (at 0 V).

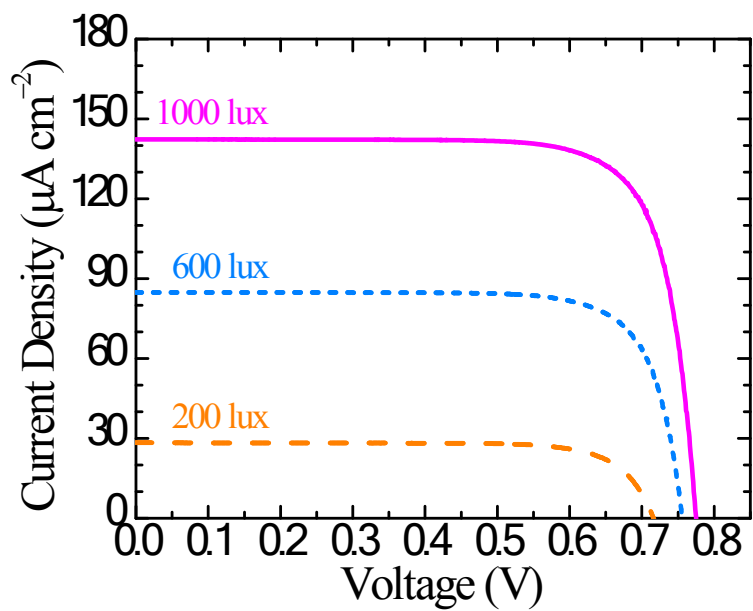

**Fig. S5**  $J$ - $V$  curves of the conventional DSiPV cells (gel electrolyte C, D35/XY1b = 7/3) using PEDOT catalysts under different LED lighting (6500 K).

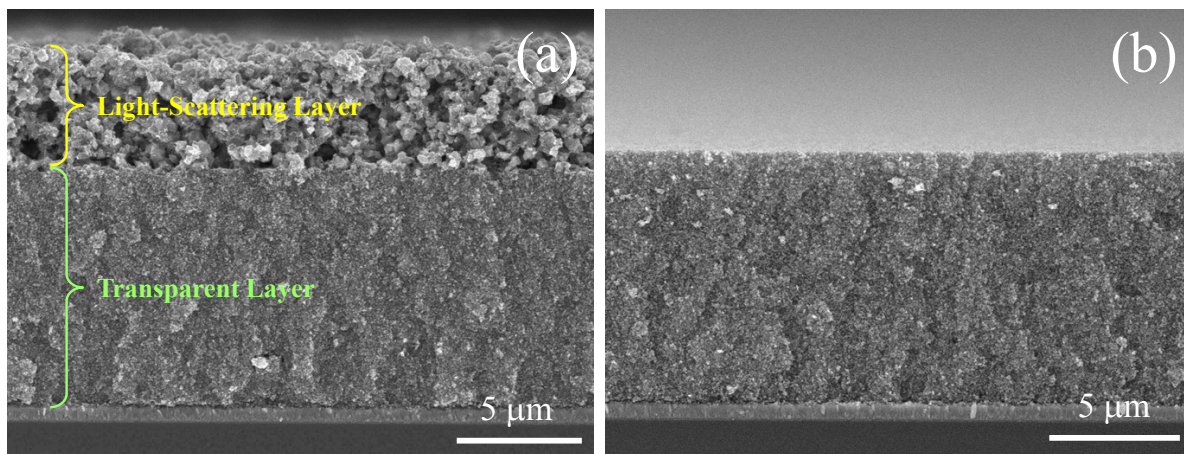

**Fig. S6** Cross-sectional SEM images of the (a) double- and (b) single-layered TiO<sub>2</sub> thin films for assembling conventional and bifacial cells respectively.

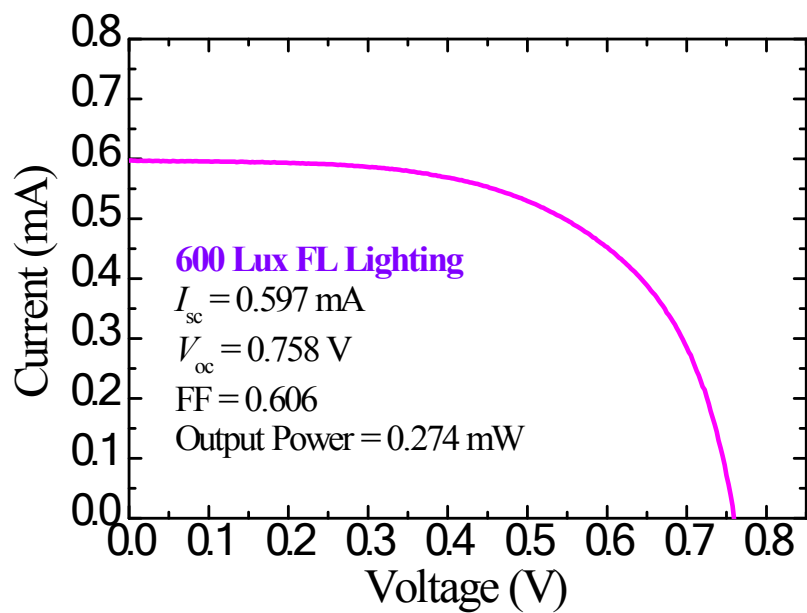

**Fig. S7** Performance of an 11.2 cm<sup>2</sup> DSiPV module device measured under 600-lux fluorescent lighting.
